# Supplementary material for: Sophisticated perspective-takers are distinctive: Neural idiosyncrasy of functional connectivity in the mentalizing network
Source: PubMed Central journal article supplement (PMC11667172; doi:10.1016/j.isci.2024.111472), 2024-11-23
Supplement: mmc1.pdf [file mmc1.pdf]

iScience, Volume 27

## **Supplemental information**

**Sophisticated perspective-takers  
are distinctive: Neural idiosyncrasy  
of functional connectivity in the mentalizing network**

**Yu Zhang, Chao Ma, Haiming Li, Leonardo Assumpção, and Yi Liu**

Supplementary Figure

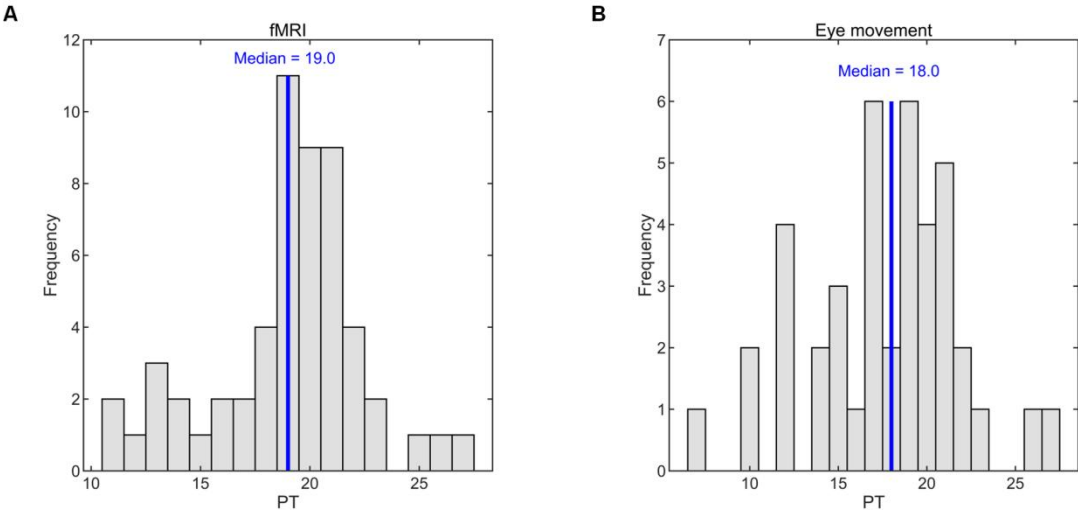

Figure S1. Distribution of perspective-taking (PT) scores.

(A and B) The distribution of PT scores for (A) the 55 participants in the fMRI experiment, and for (B) the 41 participants in the eye-movement experiment.

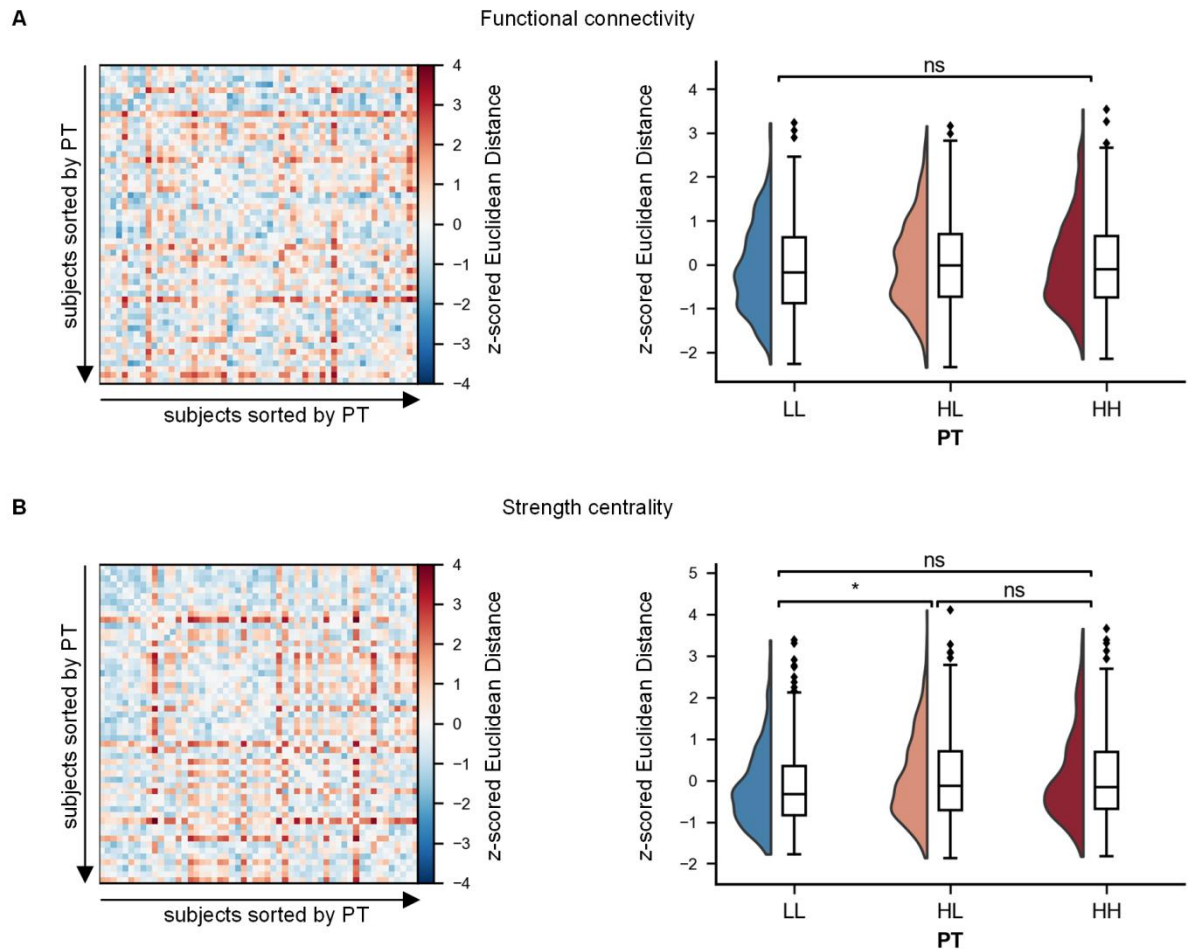

**Figure S2.** Inter-subject dissimilarity (i.e., Euclidean distance) of the functional connectivity and the strength centrality for the physical pain network.

(A and B) Left panel: inter-subject dissimilarity matrix of the functional connectivity and strength centrality within the pain network; the rows and columns of the matrix are ordered by increasing PT scores. The colors in the left panels stand for the standardized Euclidean distance of the global functional connectivity and strength centrality for each dyad. Right panel: mean inter-subject dissimilarity in three dyad groups (i.e., HH, HL, and LL). The half-violin plots represent the distribution of data. Boxes in the right panels represent the interquartile range; horizontal lines indicate the median and whiskers extend 1.5 times the interquartile range from the first and third quartiles. \* $p < 0.05$ .

## Supplementary Tables

**Table S1.** The inter-subject correlation of mentalizing network during video watching and rest.

| ROI   | Video |       | Rest  |       | <i>t</i> | <i>p</i> |
|-------|-------|-------|-------|-------|----------|----------|
|       | M     | SE    | M     | SE    |          |          |
| RTPJ  | 0.133 | 0.017 | 0.001 | 0.013 | 32.427   | < 0.001  |
| LTPJ  | 0.083 | 0.015 | 0.001 | 0.013 | 20.894   | < 0.001  |
| PreC  | 0.175 | 0.021 | 0.000 | 0.014 | 36.531   | < 0.001  |
| DMPFC | 0.051 | 0.014 | 0.004 | 0.013 | 12.708   | < 0.001  |
| MMPFC | 0.050 | 0.014 | 0.005 | 0.012 | 12.749   | < 0.001  |
| VMPFC | 0.021 | 0.013 | 0.002 | 0.012 | 5.240    | < 0.001  |

**Table S2.** Comparisons of other variables between the high and low PT groups and Spearman correlation between PT scores and other variables.

| Variable                       |                                | Categorical (low vs. high) |                  | Continuous        |          |              |       |
|--------------------------------|--------------------------------|----------------------------|------------------|-------------------|----------|--------------|-------|
|                                |                                | <i>t</i>                   | <i>p</i>         | Spearman <i>r</i> | <i>p</i> |              |       |
| fMRI                           | Demographics                   | Age                        | 0.915            | 0.364             | 0.012    | 0.933        |       |
|                                |                                | Sex <sup>a</sup>           | 0.439            | 0.508             | –        | –            |       |
|                                | Interpersonal Reactivity Index | Fantasy                    | -1.532           | 0.131             | 0.339    | <b>0.011</b> |       |
|                                |                                | Empathy                    | -2.464           | <b>0.017</b>      | 0.398    | <b>0.003</b> |       |
|                                |                                | Personal distress          | -0.342           | 0.734             | 0.141    | 0.304        |       |
|                                | Big-Five personality traits    | Neuroticism                | 0.386            | 0.701             | -0.101   | 0.462        |       |
|                                |                                | Extraversion               | -0.414           | 0.681             | 0.178    | 0.193        |       |
|                                |                                | Openness                   | -1.028           | 0.309             | 0.123    | 0.370        |       |
|                                |                                | Agreeableness              | 0.694            | 0.491             | 0.046    | 0.739        |       |
|                                |                                | Conscientiousness          | 0.309            | 0.758             | -0.037   | 0.789        |       |
|                                | Eye-movement                   | Demographics               | Age              | -0.384            | 0.703    | -0.063       | 0.696 |
|                                |                                |                            | Sex <sup>a</sup> | 0.223             | 0.636    | –            | –     |
| Interpersonal Reactivity Index |                                | Fantasy                    | 0.489            | 0.628             | -0.082   | 0.612        |       |
|                                |                                | Empathy                    | 0.153            | 0.879             | 0.102    | 0.526        |       |
|                                |                                | Personal distress          | 1.058            | 0.296             | -0.244   | 0.124        |       |
| Big-Five personality traits    |                                | Neuroticism                | 1.303            | 0.200             | -0.348   | <b>0.026</b> |       |
|                                |                                | Extraversion               | -0.903           | 0.372             | 0.311    | <b>0.048</b> |       |
|                                |                                | Openness                   | -0.620           | 0.539             | 0.212    | 0.183        |       |
|                                |                                | Agreeableness              | -2.605           | <b>0.013</b>      | 0.389    | <b>0.012</b> |       |
|                                |                                | Conscientiousness          | -1.462           | 0.152             | 0.403    | <b>0.009</b> |       |
| Verbal interpretation          |                                | Demographics               | Age              | 1.117             | 0.267    | 0.000        | 0.997 |
|                                |                                |                            | Sex <sup>a</sup> | 0.229             | 0.632    | –            | –     |
|                                | Interpersonal Reactivity Index | Fantasy                    | -0.977           | 0.331             | 0.157    | 0.136        |       |
|                                |                                | Empathy                    | -1.771           | <b>0.080</b>      | 0.237    | <b>0.024</b> |       |
|                                |                                | Personal distress          | 0.056            | 0.956             | 0.003    | 0.977        |       |
|                                | Big-Five personality traits    | Neuroticism                | 1.341            | 0.183             | -0.187   | 0.075        |       |
|                                |                                | Extraversion               | -0.873           | 0.385             | 0.218    | <b>0.038</b> |       |
|                                |                                | Openness                   | -1.147           | 0.254             | 0.142    | 0.178        |       |
|                                |                                | Agreeableness              | -1.312           | 0.193             | 0.218    | <b>0.038</b> |       |
|                                |                                | Conscientiousness          | -0.811           | 0.419             | 0.188    | 0.075        |       |

<sup>a</sup>Measured with chi-squared test

**Table S3.** Comparisons between dyad groups on the inter-subject dissimilarity of time dynamics in the mentalizing network, when controlling for potential confounding variables.

| ROI   | Contrast | $\beta$ | SE    | $p$<br>(uncorrected) | $p$<br>(corrected) |
|-------|----------|---------|-------|----------------------|--------------------|
| VMPFC | HH - LL  | -0.256  | 0.142 | 0.011                | 0.065              |
| VMPFC | HH - HL  | -0.216  | 0.087 | < 0.001              | 0.008              |
| VMPFC | HL - LL  | -0.040  | 0.087 | 0.508                | 0.609              |
| DMPFC | HH - LL  | 0.301   | 0.166 | 0.010                | 0.065              |
| DMPFC | HH - HL  | 0.138   | 0.096 | 0.043                | 0.111              |
| DMPFC | HL - LL  | 0.163   | 0.096 | 0.015                | 0.070              |
| PreC  | HH - LL  | 0.433   | 0.300 | 0.041                | 0.111              |
| PeC   | HH - HL  | 0.190   | 0.154 | 0.081                | 0.182              |
| PreC  | HL - LL  | 0.243   | 0.154 | 0.025                | 0.090              |
| LTPJ  | HH - LL  | 0.163   | 0.228 | 0.314                | 0.435              |
| LTPJ  | HH - HL  | 0.050   | 0.122 | 0.565                | 0.623              |
| LTPJ  | HL - LL  | 0.113   | 0.122 | 0.191                | 0.344              |
| RTPJ  | HH - LL  | 0.209   | 0.272 | 0.277                | 0.415              |
| RTPJ  | HH - HL  | 0.078   | 0.141 | 0.435                | 0.559              |
| RTPJ  | HL - LL  | 0.131   | 0.141 | 0.189                | 0.344              |
| MMPFC | HH - LL  | 0.067   | 0.176 | 0.588                | 0.623              |
| MMPFC | HH - HL  | -0.021  | 0.100 | 0.772                | 0.772              |
| MMPFC | HL - LL  | 0.088   | 0.100 | 0.212                | 0.346              |

**Table S4.** Correlation between mean PT scores and inter-subject dissimilarity of time dynamics for the mentalizing network, when controlling for potential confounding variables.

| ROI   | $\beta$ | $\rho$<br>(uncorrected) | $\rho$<br>(corrected) |
|-------|---------|-------------------------|-----------------------|
| PreC  | 0.171   | 0.037                   | 0.192                 |
| VMPFC | -0.072  | 0.064                   | 0.192                 |
| LTPJ  | 0.072   | 0.234                   | 0.360                 |
| MMPFC | 0.052   | 0.269                   | 0.360                 |
| DMPFC | 0.047   | 0.300                   | 0.360                 |
| RTPJ  | 0.033   | 0.655                   | 0.655                 |

**Table S5.** Comparisons between dyad groups on the inter-subject dissimilarity of functional connectivity in the mentalizing network, when controlling for potential confounding variables.

| Functional connectivity | Contrast | $\beta$ | SE    | $\rho$<br>(uncorrected) | $\rho$<br>(corrected) |
|-------------------------|----------|---------|-------|-------------------------|-----------------------|
| LTPJ - DMPFC            | HH - LL  | 0.625   | 0.275 | 0.001                   | <b>0.030</b>          |
|                         | HH - HL  | 0.300   | 0.143 | 0.003                   | <b>0.044</b>          |
|                         | HL - LL  | 0.325   | 0.143 | 0.001                   | <b>0.030</b>          |
| LTPJ - MMPFC            | HH - LL  | 0.438   | 0.268 | 0.021                   | 0.188                 |
|                         | HH - HL  | 0.189   | 0.140 | 0.055                   | 0.261                 |
|                         | HL - LL  | 0.248   | 0.140 | 0.012                   | 0.131                 |
| RTPJ - MMPFC            | HH - LL  | 0.380   | 0.246 | 0.029                   | 0.188                 |
|                         | HH - HL  | 0.176   | 0.130 | 0.056                   | 0.261                 |
|                         | HL - LL  | 0.204   | 0.130 | 0.026                   | 0.188                 |
| RTPJ - LTPJ             | HH - LL  | 0.396   | 0.298 | 0.061                   | 0.261                 |
|                         | HH - HL  | 0.200   | 0.154 | 0.066                   | 0.261                 |
|                         | HL - LL  | 0.197   | 0.154 | 0.070                   | 0.261                 |
| DMPFC - MMPFC           | HH - LL  | 0.297   | 0.299 | 0.161                   | 0.387                 |
|                         | HH - HL  | 0.156   | 0.153 | 0.151                   | 0.387                 |
|                         | HL - LL  | 0.141   | 0.153 | 0.194                   | 0.387                 |
| DMPFC - VMPFC           | HH - LL  | 0.242   | 0.256 | 0.182                   | 0.387                 |
|                         | HH - HL  | 0.150   | 0.135 | 0.114                   | 0.387                 |
|                         | HL - LL  | 0.091   | 0.135 | 0.335                   | 0.481                 |
| LTPJ - PreC             | HH - LL  | 0.186   | 0.270 | 0.332                   | 0.481                 |
|                         | HH - HL  | 0.121   | 0.141 | 0.223                   | 0.387                 |
|                         | HL - LL  | 0.064   | 0.141 | 0.519                   | 0.631                 |
| LTPJ - VMPFC            | HH - LL  | 0.273   | 0.314 | 0.218                   | 0.387                 |
|                         | HH - HL  | 0.136   | 0.161 | 0.232                   | 0.387                 |
|                         | HL - LL  | 0.138   | 0.161 | 0.226                   | 0.387                 |
| PreC - VMPFC            | HH - LL  | 0.306   | 0.334 | 0.194                   | 0.387                 |
|                         | HH - HL  | 0.152   | 0.170 | 0.204                   | 0.387                 |
|                         | HL - LL  | 0.154   | 0.170 | 0.199                   | 0.387                 |
| RTPJ - PreC             | HH - LL  | 0.312   | 0.295 | 0.136                   | 0.387                 |
|                         | HH - HL  | 0.157   | 0.152 | 0.145                   | 0.387                 |
|                         | HL - LL  | 0.155   | 0.152 | 0.149                   | 0.387                 |
| RTPJ - DMPFC            | HH - LL  | 0.182   | 0.270 | 0.342                   | 0.481                 |
|                         | HH - HL  | 0.112   | 0.141 | 0.262                   | 0.407                 |
|                         | HL - LL  | 0.070   | 0.141 | 0.482                   | 0.603                 |
| RTPJ - VMPFC            | HH - LL  | 0.175   | 0.281 | 0.377                   | 0.514                 |
|                         | HH - HL  | 0.119   | 0.146 | 0.248                   | 0.398                 |
|                         | HL - LL  | 0.057   | 0.146 | 0.582                   | 0.689                 |
| PreC - DMPFC            | HH - LL  | 0.073   | 0.276 | 0.708                   | 0.797                 |
|                         | HH - HL  | 0.077   | 0.144 | 0.446                   | 0.574                 |
|                         | HL - LL  | -0.004  | 0.144 | 0.966                   | 0.988                 |
| PreC - MMPFC            | HH - LL  | 0.083   | 0.300 | 0.695                   | 0.797                 |
|                         | HH - HL  | -0.009  | 0.154 | 0.935                   | 0.979                 |
|                         | HL - LL  | 0.092   | 0.154 | 0.399                   | 0.528                 |
| MMPFC - VMPFC           | HH - LL  | -0.025  | 0.284 | 0.900                   | 0.964                 |
|                         | HH - HL  | 0.000   | 0.147 | 0.997                   | 0.997                 |
|                         | HL - LL  | -0.026  | 0.147 | 0.804                   | 0.883                 |



**Table S6.** Comparisons of mean functional connectivity between the high and low PT groups

| Functional connectivity | Low PT |       | High PT |       | <i>t</i> | <i>p</i><br>(uncorrected) | <i>p</i><br>(corrected) |
|-------------------------|--------|-------|---------|-------|----------|---------------------------|-------------------------|
|                         | M      | SE    | M       | SE    |          |                           |                         |
| PreC - MMPFC            | 0.461  | 0.032 | 0.566   | 0.036 | -2.200   | 0.032                     | 0.483                   |
| LTPJ - MMPFC            | 0.579  | 0.033 | 0.649   | 0.043 | -1.291   | 0.202                     | 0.917                   |
| RTPJ - MMPFC            | 0.443  | 0.032 | 0.507   | 0.042 | -1.222   | 0.227                     | 0.917                   |
| PreC - VMPFC            | 0.260  | 0.036 | 0.322   | 0.045 | -1.068   | 0.290                     | 0.917                   |
| MMPFC - VMPFC           | 0.265  | 0.043 | 0.313   | 0.041 | -0.812   | 0.420                     | 0.917                   |
| LTPJ - VMPFC            | 0.242  | 0.039 | 0.287   | 0.044 | -0.783   | 0.437                     | 0.917                   |
| RTPJ - PreC             | 0.820  | 0.037 | 0.855   | 0.046 | -0.588   | 0.559                     | 0.917                   |
| DMPFC - VMPFC           | 0.205  | 0.031 | 0.234   | 0.039 | -0.583   | 0.562                     | 0.917                   |
| LTPJ - DMPFC            | 0.627  | 0.042 | 0.666   | 0.061 | -0.522   | 0.604                     | 0.917                   |
| RTPJ - DMPFC            | 0.449  | 0.041 | 0.418   | 0.045 | 0.511    | 0.611                     | 0.917                   |
| RTPJ - VMPFC            | 0.229  | 0.037 | 0.249   | 0.038 | -0.393   | 0.696                     | 0.949                   |
| LTPJ - PreC             | 0.798  | 0.041 | 0.806   | 0.046 | -0.124   | 0.902                     | 0.966                   |
| PreC - DMPFC            | 0.518  | 0.032 | 0.513   | 0.034 | 0.095    | 0.924                     | 0.966                   |
| DMPFC - MMPFC           | 0.719  | 0.053 | 0.723   | 0.053 | -0.049   | 0.961                     | 0.966                   |
| RTPJ - LTPJ             | 0.875  | 0.034 | 0.877   | 0.050 | -0.043   | 0.966                     | 0.966                   |

**Table S7.** Comparisons between dyad groups on the inter-subject dissimilarity of strength centrality for the single regions in the mentalizing network, when controlling for potential confounding variables.

| ROI   | Contrast | $\beta$ | SE    | $p$<br>(uncorrected) | $p$<br>(corrected) |
|-------|----------|---------|-------|----------------------|--------------------|
| DMPFC | HH - LL  | 0.500   | 0.278 | 0.011                | <b>0.078</b>       |
|       | HH - HL  | 0.266   | 0.145 | 0.009                | <b>0.078</b>       |
|       | HL - LL  | 0.233   | 0.145 | 0.022                | <b>0.078</b>       |
| MMPFC | HH - LL  | 0.355   | 0.228 | 0.028                | <b>0.078</b>       |
|       | HH - HL  | 0.169   | 0.123 | 0.052                | <b>0.078</b>       |
|       | HL - LL  | 0.186   | 0.123 | 0.031                | <b>0.078</b>       |
| PreC  | HH - LL  | 0.379   | 0.257 | 0.037                | <b>0.078</b>       |
|       | HH - HL  | 0.177   | 0.135 | 0.063                | <b>0.088</b>       |
|       | HL - LL  | 0.202   | 0.135 | 0.033                | <b>0.078</b>       |
| RTPJ  | HH - LL  | 0.370   | 0.248 | 0.035                | <b>0.078</b>       |
|       | HH - HL  | 0.182   | 0.132 | 0.051                | <b>0.078</b>       |
|       | HL - LL  | 0.189   | 0.132 | 0.041                | <b>0.078</b>       |
| LTPJ  | HH - LL  | 0.376   | 0.294 | 0.070                | <b>0.090</b>       |
|       | HH - HL  | 0.166   | 0.152 | 0.123                | 0.147              |
|       | HL - LL  | 0.211   | 0.152 | 0.049                | <b>0.078</b>       |
| VMPFC | HH - LL  | 0.191   | 0.302 | 0.369                | 0.391              |
|       | HH - HL  | 0.120   | 0.155 | 0.277                | 0.311              |
|       | HL - LL  | 0.072   | 0.155 | 0.512                | 0.512              |

**Table S8.** Comparisons of strength centrality in single regions between the high and low PT groups

| ROI   | Low PT |       | High PT |       | <i>t</i> | <i>p</i>      |             |
|-------|--------|-------|---------|-------|----------|---------------|-------------|
|       | M      | SE    | M       | SE    |          | (uncorrected) | (corrected) |
| MMPFC | 2.467  | 0.120 | 2.701   | 0.155 | -1.205   | 0.234         | 0.887       |
| PreC  | 2.857  | 0.116 | 3.007   | 0.159 | -0.767   | 0.446         | 0.887       |
| VMPFC | 1.200  | 0.163 | 1.328   | 0.180 | -0.529   | 0.599         | 0.887       |
| LTPJ  | 3.122  | 0.131 | 3.218   | 0.164 | -0.465   | 0.644         | 0.887       |
| RTPJ  | 2.815  | 0.124 | 2.862   | 0.169 | -0.230   | 0.819         | 0.887       |
| DMPFC | 2.518  | 0.129 | 2.486   | 0.182 | 0.143    | 0.887         | 0.887       |

**Table S9.** The ROI definitions of the pain network (selected from ref. 16)

| ROI                              | x MNI(mm) | y MNI(mm) | z MNI(mm) |
|----------------------------------|-----------|-----------|-----------|
| R. secondary sensory             | 60        | -28       | 38        |
| L. secondary sensory             | -62       | -32       | 34        |
| R. insula                        | 42        | 6         | -6        |
| L. insula                        | -42       | -2        | -4        |
| R. medial frontal gyrus          | 50        | 42        | 12        |
| L. medial frontal gyrus          | -46       | 36        | 14        |
| Anterior middle cingulate cortex | 0         | 2         | 42        |

**Table S10.** Comparisons between dyad groups on the inter-subject dissimilarity of global functional connectivity and strength centrality in the pain network, when controlling for potential confounding variables.

|                         | Contrast | $\beta$ | SE    | $p$<br>(uncorrected) | $p$<br>(corrected) |
|-------------------------|----------|---------|-------|----------------------|--------------------|
| Functional connectivity | HH - LL  | 0.213   | 0.301 | 0.316                | 0.474              |
|                         | HH - HL  | 0.045   | 0.155 | 0.680                | 0.680              |
|                         | HL - LL  | 0.168   | 0.154 | 0.123                | 0.370              |
| Strength centrality     | HH - LL  | 0.318   | 0.263 | 0.088                | 0.132              |
|                         | HH - HL  | 0.072   | 0.138 | 0.460                | 0.460              |
|                         | HL - LL  | 0.245   | 0.137 | 0.012                | 0.035              |

**Table S11.** Comparisons between dyad groups on the inter-subject dissimilarity of global functional connectivity and strength centrality for the mentalizing network in the three segments, when controlling for potential confounding variables.

|                         | Segment  | Contrast | $\beta$ | SE    | $p$<br>(uncorrected) | $p$<br>(corrected) |
|-------------------------|----------|----------|---------|-------|----------------------|--------------------|
| Functional connectivity | Segment1 | HH - LL  | 0.109   | 0.320 | 0.630                | 0.708              |
|                         |          | HH - HL  | 0.073   | 0.163 | 0.529                | 0.680              |
|                         |          | HL - LL  | 0.036   | 0.163 | 0.752                | 0.752              |
|                         | Segment2 | HH - LL  | 0.596   | 0.286 | 0.003                | <b>0.007</b>       |
|                         |          | HH - HL  | 0.309   | 0.148 | 0.003                | <b>0.007</b>       |
|                         |          | HL - LL  | 0.287   | 0.148 | 0.006                | <b>0.010</b>       |
|                         | Segment3 | HH - LL  | 0.575   | 0.264 | 0.002                | <b>0.007</b>       |
|                         |          | HH - HL  | 0.309   | 0.138 | 0.002                | <b>0.007</b>       |
|                         |          | HL - LL  | 0.265   | 0.137 | 0.006                | <b>0.010</b>       |
| Strength centrality     | Segment1 | HH - LL  | 0.207   | 0.294 | 0.320                | 0.339              |
|                         |          | HH - HL  | 0.105   | 0.152 | 0.330                | 0.339              |
|                         |          | HL - LL  | 0.102   | 0.152 | 0.339                | 0.339              |
|                         | Segment2 | HH - LL  | 0.539   | 0.261 | 0.004                | <b>0.020</b>       |
|                         |          | HH - HL  | 0.277   | 0.137 | 0.004                | <b>0.020</b>       |
|                         |          | HL - LL  | 0.262   | 0.136 | 0.007                | <b>0.020</b>       |
|                         | Segment3 | HH - LL  | 0.402   | 0.236 | 0.016                | <b>0.029</b>       |
|                         |          | HH - HL  | 0.227   | 0.126 | 0.011                | <b>0.025</b>       |
|                         |          | HL - LL  | 0.175   | 0.125 | 0.047                | <b>0.071</b>       |

**Table S12.** Comparisons between dyad groups on the inter-subject dissimilarity of global functional connectivity and strength centrality for the mentalizing network in the resting state, when controlling for potential confounding variables.

|                         | Contrast | $\beta$ | SE    | $p$<br>(uncorrected) | $p$<br>(corrected) |
|-------------------------|----------|---------|-------|----------------------|--------------------|
| Functional connectivity | HH - LL  | 0.226   | 0.287 | 0.266                | 0.335              |
|                         | HH - HL  | 0.125   | 0.150 | 0.237                | 0.335              |
|                         | HL - LL  | 0.101   | 0.148 | 0.335                | 0.335              |
| Strength centrality     | HH - LL  | 0.056   | 0.28  | 0.776                | 0.906              |
|                         | HH - HL  | 0.044   | 0.146 | 0.669                | 0.906              |
|                         | HL - LL  | 0.012   | 0.145 | 0.906                | 0.906              |

**Table S13.** Comparisons between dyad groups on the inter-subject dissimilarity of neural indices, when controlling for that of resting state and potential confounding variables.

|                         | Contrast | $\beta$ | SE    | $p$<br>(uncorrected) | $p$<br>(corrected) |
|-------------------------|----------|---------|-------|----------------------|--------------------|
| Functional connectivity | HH - LL  | 0.437   | 0.290 | 0.033                | <b>0.050</b>       |
|                         | HH - HL  | 0.235   | 0.150 | 0.027                | <b>0.050</b>       |
|                         | HL - LL  | 0.202   | 0.149 | 0.056                | <b>0.056</b>       |
| Strength centrality     | HH - LL  | 0.515   | 0.256 | 0.004                | <b>0.007</b>       |
|                         | HH - HL  | 0.247   | 0.136 | 0.010                | <b>0.010</b>       |
|                         | HL - LL  | 0.267   | 0.133 | 0.005                | <b>0.007</b>       |
